# Supplementary material for: Rates of Prevalent HIV Infection, Prevalent Diagnoses, and New Diagnoses Among Men Who Have Sex With Men in US States, Metropolitan Statistical Areas, and Counties, 2012-2013
Source: PubMed Central journal article supplement (PMC4887662; doi:10.2196/publichealth.5684), 2016-05-17
Supplement: publichealth_v2i1e22_app1.pdf [file publichealth_v2i1e22_app1.pdf]

## Supplement

### Rates of prevalent HIV infection, prevalent diagnoses and new diagnoses among men who have sex with men (MSM) in US states, metropolitan statistical areas, and counties, 2012-2013

Eli S. Rosenberg, PhD, Jeremy A. Grey, PhD, Travis H. Sanchez, DVM, Patrick S. Sullivan, PhD DVM

#### Part 1. Number of MSM, 2012

This manuscript used estimates of the county-level population sizes of men who have sex with men (MSM) in 2012 and 2013. The results for 2013 are included in the companion article on our method [1]. Here, we provide estimates for 2012 at the state and metropolitan statistical area (MSA) levels (also referred to as core-based statistical area [CBSA] level in the companion article).

**Supplement Table 1.** Estimated population size of men who have sex with men in 50 states and the District of Columbia, using housing and population estimates from the American Community Survey, 2008-2012.

| State                | Adult males | MSM      |            |
|----------------------|-------------|----------|------------|
|                      | <i>N</i>    | <i>n</i> | % of males |
| Alabama              | 1,739,878   | 40,812   | 2.3%       |
| Alaska               | 273,669     | 5,162    | 1.9%       |
| Arizona              | 2,357,342   | 107,515  | 4.6%       |
| Arkansas             | 1,068,010   | 18,909   | 1.8%       |
| California           | 13,810,868  | 785,954  | 5.7%       |
| Colorado             | 1,904,108   | 70,287   | 3.7%       |
| Connecticut          | 1,323,562   | 43,525   | 3.3%       |
| Delaware             | 331,320     | 13,193   | 4.0%       |
| District of Columbia | 233,939     | 35,110   | 15.0%      |
| Florida              | 7,186,086   | 331,070  | 4.6%       |
| Georgia              | 3,478,235   | 130,214  | 3.7%       |
| Hawaii               | 527,813     | 15,751   | 3.0%       |
| Idaho                | 567,187     | 9,687    | 1.7%       |
| Illinois             | 4,701,376   | 201,596  | 4.3%       |
| Indiana              | 2,371,363   | 70,228   | 3.0%       |
| Iowa                 | 1,136,654   | 20,774   | 1.8%       |
| Kansas               | 1,045,398   | 22,687   | 2.2%       |
| Kentucky             | 1,609,713   | 45,741   | 2.8%       |
| Louisiana            | 1,646,198   | 41,220   | 2.5%       |
| Maine                | 509,723     | 15,025   | 2.9%       |

---

|                |                    |                  |             |
|----------------|--------------------|------------------|-------------|
| Maryland       | 2,109,864          | 82,629           | 3.9%        |
| Massachusetts  | 2,450,324          | 112,995          | 4.6%        |
| Michigan       | 3,658,367          | 112,434          | 3.1%        |
| Minnesota      | 1,982,819          | 79,645           | 4.0%        |
| Mississippi    | 1,055,795          | 19,151           | 1.8%        |
| Missouri       | 2,204,131          | 72,415           | 3.3%        |
| Montana        | 382,786            | 6,530            | 1.7%        |
| Nebraska       | 672,249            | 12,677           | 1.9%        |
| Nevada         | 1,025,612          | 51,429           | 5.0%        |
| New Hampshire  | 503,623            | 13,997           | 2.8%        |
| New Jersey     | 3,231,850          | 130,952          | 4.1%        |
| New Mexico     | 752,990            | 16,980           | 2.3%        |
| New York       | 7,184,245          | 373,806          | 5.2%        |
| North Carolina | 3,486,140          | 101,062          | 2.9%        |
| North Dakota   | 264,770            | 3,969            | 1.5%        |
| Ohio           | 4,241,771          | 139,189          | 3.3%        |
| Oklahoma       | 1,380,741          | 37,671           | 2.7%        |
| Oregon         | 1,456,607          | 60,528           | 4.2%        |
| Pennsylvania   | 4,765,333          | 159,785          | 3.4%        |
| Rhode Island   | 394,203            | 23,182           | 5.9%        |
| South Carolina | 1,703,151          | 33,896           | 2.0%        |
| South Dakota   | 305,101            | 5,411            | 1.8%        |
| Tennessee      | 2,332,882          | 74,852           | 3.2%        |
| Texas          | 9,007,898          | 365,088          | 4.1%        |
| Utah           | 944,257            | 32,522           | 3.4%        |
| Vermont        | 242,270            | 6,942            | 2.9%        |
| Virginia       | 2,989,024          | 111,842          | 3.7%        |
| Washington     | 2,552,526          | 112,627          | 4.4%        |
| West Virginia  | 712,946            | 12,556           | 1.8%        |
| Wisconsin      | 2,139,759          | 58,258           | 2.7%        |
| Wyoming        | 217,176            | 3,290            | 1.5%        |
| <b>Total</b>   | <b>114,173,652</b> | <b>4,452,772</b> | <b>3.9%</b> |

---

**Supplement Table 2.** Estimated population size of men who have sex with men in 104 metropolitan statistical areas with HIV surveillance data, using housing and population estimates from the American Community Survey, 2008-2012.

| <b>Metropolitan statistical area</b>     | <b>Adult males</b> | <b>MSM</b> |            |
|------------------------------------------|--------------------|------------|------------|
|                                          | <i>n</i>           | <i>n</i>   | % of males |
| Akron, OH                                | 260,901            | 5,810      | 2.2%       |
| Albany--Schenectady--Troy, NY            | 330,126            | 9,294      | 2.8%       |
| Albuquerque, NM                          | 325,150            | 8,608      | 2.6%       |
| Allentown--Bethlehem--Easton, PA--NJ     | 304,919            | 6,637      | 2.2%       |
| Atlanta--Sandy Springs--Roswell, GA      | 1,871,931          | 99,826     | 5.3%       |
| Augusta--Richmond County, GA--SC         | 204,039            | 3,464      | 1.7%       |
| Austin--Round Rock, TX                   | 645,051            | 39,949     | 6.2%       |
| Bakersfield, CA                          | 303,162            | 5,923      | 2.0%       |
| Baltimore--Columbia--Towson, MD          | 990,429            | 44,827     | 4.5%       |
| Baton Rouge, LA                          | 292,975            | 6,200      | 2.1%       |
| Birmingham--Hoover, AL                   | 405,899            | 16,451     | 4.1%       |
| Boise City, ID                           | 221,426            | 3,829      | 1.7%       |
| Boston--Cambridge--Newton, MA--NH        | 1,707,425          | 93,254     | 5.5%       |
| Bridgeport--Stamford--Norwalk, CT        | 330,908            | 8,315      | 2.5%       |
| Buffalo--Cheektowaga--Niagara Falls, NY  | 423,522            | 21,926     | 5.2%       |
| Cape Coral--Fort Myers, FL               | 243,975            | 7,157      | 2.9%       |
| Charleston--North Charleston, SC         | 248,282            | 5,539      | 2.2%       |
| Charlotte--Concord--Gastonia, NC--SC     | 793,084            | 34,822     | 4.4%       |
| Chattanooga, TN--GA                      | 195,386            | 4,364      | 2.2%       |
| Chicago--Naperville--Elgin, IL--IN--WI   | 3,417,204          | 177,280    | 5.2%       |
| Cincinnati, OH--KY--IN                   | 764,794            | 30,977     | 4.1%       |
| Cleveland--Elyria, OH                    | 753,541            | 33,700     | 4.5%       |
| Colorado Springs, CO                     | 237,290            | 4,556      | 1.9%       |
| Columbia, SC                             | 282,061            | 6,384      | 2.3%       |
| Columbus, OH                             | 695,762            | 37,445     | 5.4%       |
| Dallas--Fort Worth--Arlington, TX        | 2,272,239          | 131,843    | 5.8%       |
| Dayton, OH                               | 293,801            | 6,582      | 2.2%       |
| Deltona--Daytona Beach--Ormond Beach, FL | 230,773            | 5,612      | 2.4%       |
| Denver--Aurora--Lakewood, CO             | 946,541            | 53,532     | 5.7%       |
| Des Moines--West Des Moines, IA          | 204,551            | 4,820      | 2.4%       |
| Detroit--Warren--Dearborn, MI            | 1,554,107          | 62,835     | 4.0%       |
| Durham--Chapel Hill, NC                  | 185,349            | 5,490      | 3.0%       |
| El Paso, TX                              | 268,100            | 4,353      | 1.6%       |
| Fresno, CA                               | 323,309            | 7,496      | 2.3%       |
| Grand Rapids--Wyoming, MI                | 357,276            | 16,825     | 4.7%       |
| Greensboro--High Point, NC               | 261,145            | 5,800      | 2.2%       |
| Greenville--Anderson--Mauldin, SC        | 303,073            | 5,620      | 1.9%       |

|                                                  |           |         |      |
|--------------------------------------------------|-----------|---------|------|
| Harrisburg--Carlisle, PA                         | 206,297   | 5,698   | 2.8% |
| Hartford--West Hartford--East Hartford, CT       | 452,424   | 22,723  | 5.0% |
| Honolulu (Urban), HI                             | 371,128   | 10,392  | 2.8% |
| Houston--The Woodlands--Sugar Land, TX           | 2,107,885 | 102,173 | 4.8% |
| Indianapolis--Carmel--Anderson, IN               | 673,477   | 32,882  | 4.9% |
| Jackson, MS                                      | 197,416   | 4,067   | 2.1% |
| Jacksonville, FL                                 | 493,776   | 22,767  | 4.6% |
| Kansas City, MO--KS                              | 721,757   | 33,127  | 4.6% |
| Knoxville, TN                                    | 316,231   | 6,127   | 1.9% |
| Lakeland--Winter Haven, FL                       | 223,966   | 5,511   | 2.5% |
| Lancaster, PA                                    | 188,228   | 4,637   | 2.5% |
| Las Vegas--Henderson--Paradise, NV               | 734,840   | 45,828  | 6.2% |
| Little Rock--North Little Rock--Conway, AR       | 253,254   | 5,178   | 2.0% |
| Los Angeles--Long Beach--Anaheim, CA             | 4,741,785 | 308,066 | 6.5% |
| Louisville--Jefferson County, KY--IN             | 452,825   | 22,743  | 5.0% |
| Madison, WI                                      | 233,189   | 6,417   | 2.8% |
| McAllen--Edinburg--Mission, TX                   | 241,482   | 4,286   | 1.8% |
| Memphis, TN--MS--AR                              | 457,558   | 21,028  | 4.6% |
| Miami--Fort Lauderdale--West Palm Beach, FL      | 2,096,754 | 133,591 | 6.4% |
| Milwaukee--Waukesha--West Allis, WI              | 561,587   | 25,933  | 4.6% |
| Minneapolis--St. Paul--Bloomington, MN--WI       | 1,232,429 | 67,872  | 5.5% |
| Modesto, CA                                      | 179,312   | 3,217   | 1.8% |
| Nashville--Davidson--Murfreesboro--Franklin, TN  | 610,381   | 30,347  | 5.0% |
| New Haven--Milford, CT                           | 316,784   | 7,389   | 2.3% |
| New Orleans--Metairie, LA                        | 435,817   | 20,395  | 4.7% |
| New York--Newark--Jersey City, NY--NJ--PA        | 7,165,159 | 395,928 | 5.5% |
| North Port--Sarasota--Bradenton, FL              | 274,444   | 8,108   | 3.0% |
| Ogden--Clearfield, UT                            | 199,809   | 3,625   | 1.8% |
| Oklahoma City, OK                                | 458,782   | 21,265  | 4.6% |
| Omaha--Council Bluffs, NE--IA                    | 311,192   | 7,574   | 2.4% |
| Orlando--Kissimmee--Sanford, FL                  | 795,885   | 45,547  | 5.7% |
| Oxnard--Thousand Oaks--Ventura, CA               | 301,053   | 7,522   | 2.5% |
| Palm Bay--Melbourne--Titusville, FL              | 211,429   | 5,032   | 2.4% |
| Philadelphia--Camden--Wilmington, PA--NJ--DE--MD | 2,171,443 | 100,373 | 4.6% |
| Phoenix--Mesa--Scottsdale, AZ                    | 1,530,468 | 89,126  | 5.8% |
| Pittsburgh, PA                                   | 896,941   | 37,891  | 4.2% |
| Portland--South Portland, ME                     | 194,947   | 7,562   | 3.9% |
| Portland--Vancouver--Hillsboro, OR--WA           | 833,286   | 52,287  | 6.3% |
| Providence--Warwick, RI--MA                      | 597,633   | 31,001  | 5.2% |
| Provo--Orem, UT                                  | 169,367   | 2,368   | 1.4% |
| Raleigh, NC                                      | 403,724   | 20,135  | 5.0% |
| Richmond, VA                                     | 441,102   | 17,772  | 4.0% |
| Riverside--San Bernardino--Ontario, CA           | 1,487,933 | 93,321  | 6.3% |

|                                                   |           |         |      |
|---------------------------------------------------|-----------|---------|------|
| Rochester, NY                                     | 400,877   | 20,825  | 5.2% |
| Sacramento--Roseville--Arden-Arcade, CA           | 783,062   | 44,804  | 5.7% |
| Salt Lake City, UT                                | 384,280   | 22,669  | 5.9% |
| San Antonio--New Braunfels, TX                    | 763,142   | 35,488  | 4.7% |
| San Diego--Carlsbad--San Marcos, CA               | 1,185,465 | 79,742  | 6.7% |
| San Francisco--Oakland--Hayward, CA               | 1,675,079 | 149,806 | 8.9% |
| San Jose--Sunnyvale--Santa Clara, CA              | 697,953   | 37,748  | 5.4% |
| Scranton--Wilkes-Barre--Hazleton, PA              | 215,374   | 3,739   | 1.7% |
| Seattle--Tacoma--Bellevue, WA                     | 1,319,369 | 81,998  | 6.2% |
| Spokane--Spokane Valley, WA                       | 198,082   | 5,264   | 2.7% |
| Springfield, MA                                   | 228,149   | 5,176   | 2.3% |
| St. Louis, MO--IL                                 | 1,008,456 | 39,036  | 3.9% |
| Stockton--Lodi, CA                                | 239,028   | 5,130   | 2.1% |
| Syracuse, NY                                      | 244,499   | 6,150   | 2.5% |
| Tampa--St. Petersburg--Clearwater, FL             | 1,051,763 | 62,239  | 5.9% |
| Toledo, OH                                        | 222,959   | 4,570   | 2.0% |
| Tucson, AZ                                        | 367,451   | 10,401  | 2.8% |
| Tulsa, OK                                         | 337,751   | 7,307   | 2.2% |
| Virginia Beach--Norfolk--Newport News, VA--NC     | 622,546   | 24,493  | 3.9% |
| Washington--Arlington--Alexandria, DC--VA--MD--WV | 2,068,780 | 118,961 | 5.8% |
| Wichita, KS                                       | 225,215   | 4,019   | 1.8% |
| Winston-Salem, NC                                 | 230,211   | 4,913   | 2.1% |
| Worcester, MA--CT                                 | 342,863   | 8,709   | 2.5% |
| Youngstown--Warren--Boardman, OH--PA              | 211,666   | 3,549   | 1.7% |

## Part 2. Sensitivity Analyses

### Methods

The denominators for our analyses were derived using a method of estimating the county-level population sizes of men who have sex with men (MSM) [1]. In order to examine the influence of this estimation method on our findings, we conducted analyses using two additional sets of denominators from methods based on previous studies [2, 3]. For the following tables, we have labeled these methods Method 1, Method 2, and Method 3, in order of increasing complexity. The first, Method 1, multiplies a standard percentage of adult men who have had sex with another man in the past five years by the number of adult men in each county to determine the number of MSM. For this value, we used 3.9%, as reported in Purcell et al. The second method (Method 2) uses the stratified percentages of adult men who have had sex with another man in the past year at four levels of urbanicity: *large central metropolitan counties* (4.4%); *large fringe metropolitan counties* (2.5%); *small or medium metropolitan counties* (1.4%); and *non-metropolitan counties* (1.1%). These percentages are multiplied by the number of adult males in counties of the corresponding urbanicity levels to obtain the number of men who had sex with another man in the past year. These population sizes are then scaled up to achieve the national 5-year male-male sex estimate from Method 1, or 3.9% of the US adult male population. Finally, Method 3 applies the method reported in Grey et al. [1], which uses the assumed national percentage of US men who have had sex with another man in the past five years [3], the urbanicity-specific percentage of US

men who have had sex with another man in the past year [2], and the relative representation of same-sex male households in an area, as used by Lieb et al [4]. A summary of the major components of the three models is provided in Supplement Table 3.

**Supplement Table 3.** Major components of three methods to estimate the county-level population sizes of men who have sex with men in the US, using data from the American Community Survey

| Component                                                                                                                                               | Method |   |   |
|---------------------------------------------------------------------------------------------------------------------------------------------------------|--------|---|---|
|                                                                                                                                                         | 1      | 2 | 3 |
| 3.9% of adult men in the US have had sex with another man in the past five years                                                                        | X      | X | X |
| Variation of the percentage of adult men who have had sex with another man by urbanicity strata                                                         |        | X | X |
| Within urbanicity strata, the percentage of adult men who have sex with men varies according to the relative representation of same-sex male households |        |   | X |

## Results

Each method was used to generate the outcomes reported in Tables 2 through 4 of the manuscript. The following tables present findings according to the three methods, with each rate as its own table. Thus, Table 2 is presented as Supplement Tables 4a (state-level prevalences of HIV diagnosis among MSM), 4b (state-level rates of new HIV diagnosis among all MSM), and 4c (state-level rates of new HIV diagnosis among MSM without an HIV diagnosis); Table 3 is presented as Supplement Tables 5a (state-level prevalence of HIV among MSM) and 5b (state-level prevalence of undiagnosed HIV among MSM); and Table 4 is presented as Supplement Tables 6a (CBSA-level prevalence of HIV diagnosis among MSM), 6b (CBSA-level rates of new diagnosis among all MSM), and 6c (CBSA-level rates of new diagnosis among MSM without an HIV diagnosis).

**Supplement Table 4a.** Prevalence of HIV diagnoses among men who have sex with men, US states and District of Columbia, 2012

| State                | n      | Rate per 100 MSM |          |          |
|----------------------|--------|------------------|----------|----------|
|                      |        | Method 1         | Method 2 | Method 3 |
| Alabama              | 6,442  | 9.49             | 13.05    | 15.78    |
| Alaska               | 335    | 3.14             | 6.10     | 6.49     |
| Arizona              | 8,748  | 9.52             | 7.47     | 8.14     |
| Arkansas             | 2,843  | 6.83             | 13.30    | 15.04    |
| California           | 85,307 | 15.84            | 11.60    | 10.85    |
| Colorado             | 8,028  | 10.81            | 12.76    | 11.42    |
| Connecticut          | 3,178  | 6.16             | 6.97     | 7.30     |
| Delaware             | 1,115  | 8.63             | 10.59    | 8.45     |
| District of Columbia | 7,360  | 80.67            | 46.29    | 20.96    |
| Florida              | 47,520 | 16.96            | 15.70    | 14.35    |
| Georgia              | 24,101 | 17.77            | 21.15    | 18.51    |
| Hawaii               | 1,758  | 8.54             | 16.03    | 11.16    |
| Idaho                | 477    | 2.16             | 4.21     | 4.92     |
| Illinois             | 20,495 | 11.18            | 9.69     | 10.17    |

|                                          |                |              |              |              |
|------------------------------------------|----------------|--------------|--------------|--------------|
| Indiana                                  | 5,876          | 6.35         | 7.73         | 8.37         |
| Iowa                                     | 1,133          | 2.56         | 5.08         | 5.45         |
| Kansas                                   | 1,723          | 4.23         | 6.63         | 7.59         |
| Kentucky                                 | 3,697          | 5.89         | 7.68         | 8.08         |
| Louisiana                                | 8,954          | 13.95        | 19.71        | 21.72        |
| Maine                                    | 771            | 3.88         | 7.69         | 5.13         |
| Maryland                                 | 11,052         | 13.43        | 13.24        | 13.38        |
| Massachusetts                            | 8,181          | 8.56         | 9.00         | 7.24         |
| Michigan                                 | 9,377          | 6.57         | 7.03         | 8.34         |
| Minnesota                                | 4,416          | 5.71         | 5.58         | 5.54         |
| Mississippi                              | 4,469          | 10.85        | 20.70        | 23.34        |
| Missouri                                 | 7,994          | 9.30         | 10.59        | 11.04        |
| Montana                                  | 239            | 1.60         | 3.35         | 3.66         |
| Nebraska                                 | 1,015          | 3.87         | 7.59         | 8.01         |
| Nevada                                   | 5,070          | 12.68        | 9.09         | 9.86         |
| New Hampshire                            | 621            | 3.16         | 4.89         | 4.44         |
| New Jersey                               | 13,402         | 10.63        | 9.61         | 10.23        |
| New Mexico                               | 1,729          | 5.89         | 11.44        | 10.18        |
| New York                                 | 54,606         | 19.49        | 15.44        | 14.61        |
| North Carolina                           | 13,202         | 9.71         | 12.09        | 13.06        |
| North Dakota                             | 132            | 1.28         | 2.59         | 3.33         |
| Ohio                                     | 12,259         | 7.41         | 7.83         | 8.81         |
| Oklahoma                                 | 3,293          | 6.12         | 7.67         | 8.74         |
| Oregon                                   | 3,673          | 6.47         | 7.31         | 6.07         |
| Pennsylvania                             | 12,477         | 6.71         | 7.33         | 7.81         |
| Rhode Island                             | 949            | 6.17         | 4.30         | 4.09         |
| South Carolina                           | 7,332          | 11.04        | 19.51        | 21.63        |
| South Dakota                             | 196            | 1.65         | 3.36         | 3.62         |
| Tennessee                                | 9,198          | 10.11        | 11.42        | 12.29        |
| Texas                                    | 42,973         | 12.23        | 10.45        | 11.77        |
| Utah                                     | 1,532          | 4.16         | 4.12         | 4.71         |
| Vermont                                  | 275            | 2.91         | 6.12         | 3.96         |
| Virginia                                 | 11,888         | 10.20        | 10.66        | 10.63        |
| Washington                               | 7,681          | 7.72         | 7.59         | 6.82         |
| West Virginia                            | 930            | 3.34         | 6.43         | 7.41         |
| Wisconsin                                | 3,388          | 4.06         | 5.23         | 5.82         |
| Wyoming                                  | 133            | 1.57         | 3.34         | 4.04         |
| <b>50 US States &amp; Washington, DC</b> | <b>493,453</b> | <b>11.08</b> | <b>11.08</b> | <b>11.08</b> |

**Supplement Table 4b.** Rates of new diagnoses among men who have sex with men, US states and District of Columbia, 2013

| State                | n     | Rate per 100 MSM |          |          |
|----------------------|-------|------------------|----------|----------|
|                      |       | Method 1         | Method 2 | Method 3 |
| Alabama              | 442   | 0.65             | 0.89     | 1.09     |
| Alaska               | 12    | 0.11             | 0.22     | 0.24     |
| Arizona              | 513   | 0.55             | 0.43     | 0.46     |
| Arkansas             | 192   | 0.46             | 0.89     | 1.00     |
| California           | 3,860 | 0.71             | 0.52     | 0.49     |
| Colorado             | 241   | 0.32             | 0.38     | 0.33     |
| Connecticut          | 188   | 0.36             | 0.41     | 0.43     |
| Delaware             | 60    | 0.46             | 0.56     | 0.46     |
| District of Columbia | 313   | 3.35             | 1.92     | 0.85     |
| Florida              | 2,711 | 0.95             | 0.88     | 0.80     |
| Georgia              | 1,708 | 1.24             | 1.48     | 1.30     |
| Hawaii               | 78    | 0.37             | 0.70     | 0.51     |
| Idaho                | 15    | 0.07             | 0.13     | 0.15     |
| Illinois             | 1,273 | 0.69             | 0.60     | 0.64     |
| Indiana              | 332   | 0.36             | 0.43     | 0.47     |
| Iowa                 | 77    | 0.17             | 0.34     | 0.37     |
| Kansas               | 109   | 0.27             | 0.42     | 0.48     |
| Kentucky             | 260   | 0.41             | 0.54     | 0.55     |
| Louisiana            | 730   | 1.12             | 1.58     | 1.76     |
| Maine                | 21    | 0.11             | 0.21     | 0.14     |
| Maryland             | 762   | 0.91             | 0.90     | 0.90     |
| Massachusetts        | 443   | 0.46             | 0.48     | 0.40     |
| Michigan             | 547   | 0.38             | 0.41     | 0.48     |
| Minnesota            | 202   | 0.26             | 0.25     | 0.24     |
| Mississippi          | 316   | 0.76             | 1.45     | 1.66     |
| Missouri             | 341   | 0.39             | 0.45     | 0.48     |
| Montana              | 19    | 0.13             | 0.26     | 0.30     |
| Nebraska             | 51    | 0.19             | 0.38     | 0.39     |
| Nevada               | 329   | 0.81             | 0.58     | 0.64     |
| New Hampshire        | 21    | 0.11             | 0.16     | 0.15     |
| New Jersey           | 790   | 0.62             | 0.56     | 0.60     |
| New Mexico           | 102   | 0.34             | 0.67     | 0.57     |
| New York             | 2,264 | 0.80             | 0.63     | 0.61     |
| North Carolina       | 859   | 0.62             | 0.77     | 0.83     |
| North Dakota         | 13    | 0.12             | 0.25     | 0.29     |
| Ohio                 | 767   | 0.46             | 0.49     | 0.53     |
| Oklahoma             | 236   | 0.43             | 0.54     | 0.63     |
| Oregon               | 159   | 0.28             | 0.31     | 0.26     |
| Pennsylvania         | 739   | 0.39             | 0.43     | 0.45     |
| Rhode Island         | 54    | 0.35             | 0.24     | 0.23     |
| South Carolina       | 452   | 0.67             | 1.19     | 1.24     |
| South Dakota         | 9     | 0.07             | 0.15     | 0.17     |
| Tennessee            | 563   | 0.61             | 0.69     | 0.76     |



|                                          |               |             |             |             |
|------------------------------------------|---------------|-------------|-------------|-------------|
| Texas                                    | 3,129         | 0.87        | 0.75        | 0.84        |
| Utah                                     | 72            | 0.19        | 0.19        | 0.22        |
| Vermont                                  | 12            | 0.13        | 0.27        | 0.17        |
| Virginia                                 | 683           | 0.58        | 0.60        | 0.61        |
| Washington                               | 325           | 0.32        | 0.32        | 0.29        |
| West Virginia                            | 46            | 0.16        | 0.32        | 0.35        |
| Wisconsin                                | 190           | 0.23        | 0.29        | 0.32        |
| Wyoming                                  | 11            | 0.13        | 0.27        | 0.34        |
| <b>50 US States &amp; Washington, DC</b> | <b>27,641</b> | <b>0.61</b> | <b>0.61</b> | <b>0.61</b> |

**Supplement Table 4c.** Rates of new diagnoses among men who have sex with men and who do not have an HIV diagnosis, US states and District of Columbia, 2013

| State                | Rate per 100 MSM without an HIV diagnosis |          |          |          |
|----------------------|-------------------------------------------|----------|----------|----------|
|                      | n                                         | Method 1 | Method 2 | Method 3 |
| Alabama              | 442                                       | 0.71     | 1.02     | 1.29     |
| Alaska               | 12                                        | 0.11     | 0.23     | 0.25     |
| Arizona              | 513                                       | 0.61     | 0.47     | 0.50     |
| Arkansas             | 192                                       | 0.49     | 1.03     | 1.17     |
| California           | 3,860                                     | 0.84     | 0.59     | 0.55     |
| Colorado             | 241                                       | 0.36     | 0.43     | 0.37     |
| Connecticut          | 188                                       | 0.38     | 0.44     | 0.47     |
| Delaware             | 60                                        | 0.50     | 0.63     | 0.50     |
| District of Columbia | 313                                       | 15.68    | 3.51     | 1.06     |
| Florida              | 2,711                                     | 1.15     | 1.05     | 0.93     |
| Georgia              | 1,708                                     | 1.51     | 1.87     | 1.59     |
| Hawaii               | 78                                        | 0.41     | 0.83     | 0.57     |
| Idaho                | 15                                        | 0.07     | 0.14     | 0.16     |
| Illinois             | 1,273                                     | 0.78     | 0.66     | 0.71     |
| Indiana              | 332                                       | 0.38     | 0.47     | 0.52     |
| Iowa                 | 77                                        | 0.18     | 0.36     | 0.39     |
| Kansas               | 109                                       | 0.28     | 0.45     | 0.51     |
| Kentucky             | 260                                       | 0.44     | 0.58     | 0.60     |
| Louisiana            | 730                                       | 1.30     | 1.96     | 2.24     |
| Maine                | 21                                        | 0.11     | 0.23     | 0.15     |
| Maryland             | 762                                       | 1.05     | 1.04     | 1.04     |
| Massachusetts        | 443                                       | 0.50     | 0.53     | 0.43     |
| Michigan             | 547                                       | 0.41     | 0.44     | 0.52     |
| Minnesota            | 202                                       | 0.27     | 0.27     | 0.26     |
| Mississippi          | 316                                       | 0.85     | 1.83     | 2.18     |
| Missouri             | 341                                       | 0.43     | 0.50     | 0.54     |
| Montana              | 19                                        | 0.13     | 0.27     | 0.31     |
| Nebraska             | 51                                        | 0.20     | 0.41     | 0.42     |
| Nevada               | 329                                       | 0.93     | 0.64     | 0.71     |

|                                          |               |             |             |             |
|------------------------------------------|---------------|-------------|-------------|-------------|
| New Hampshire                            | 21            | 0.11        | 0.17        | 0.16        |
| New Jersey                               | 790           | 0.70        | 0.62        | 0.66        |
| New Mexico                               | 102           | 0.36        | 0.75        | 0.63        |
| New York                                 | 2,264         | 0.99        | 0.75        | 0.72        |
| North Carolina                           | 859           | 0.69        | 0.88        | 0.96        |
| North Dakota                             | 13            | 0.12        | 0.26        | 0.30        |
| Ohio                                     | 767           | 0.50        | 0.53        | 0.58        |
| Oklahoma                                 | 236           | 0.46        | 0.59        | 0.69        |
| Oregon                                   | 159           | 0.30        | 0.34        | 0.27        |
| Pennsylvania                             | 739           | 0.42        | 0.47        | 0.49        |
| Rhode Island                             | 54            | 0.37        | 0.26        | 0.24        |
| South Carolina                           | 452           | 0.75        | 1.47        | 1.56        |
| South Dakota                             | 9             | 0.08        | 0.16        | 0.18        |
| Tennessee                                | 563           | 0.68        | 0.78        | 0.87        |
| Texas                                    | 3,129         | 0.99        | 0.83        | 0.95        |
| Utah                                     | 72            | 0.20        | 0.20        | 0.23        |
| Vermont                                  | 12            | 0.13        | 0.28        | 0.18        |
| Virginia                                 | 683           | 0.64        | 0.67        | 0.68        |
| Washington                               | 325           | 0.35        | 0.34        | 0.31        |
| West Virginia                            | 46            | 0.17        | 0.34        | 0.38        |
| Wisconsin                                | 190           | 0.24        | 0.31        | 0.34        |
| Wyoming                                  | 11            | 0.13        | 0.28        | 0.36        |
| <b>50 US States &amp; Washington, DC</b> | <b>27,641</b> | <b>0.69</b> | <b>0.69</b> | <b>0.69</b> |

Supplement Table 5a. Prevalence of HIV infection among men who have sex with men, by US state, 2012

| State                | n       | Rate per 100 MSM |          |          |
|----------------------|---------|------------------|----------|----------|
|                      |         | Method 1         | Method 2 | Method 3 |
| Alabama              | 7,900   | 11.64            | 16.00    | 19.36    |
| Alaska *             | 410     | 3.84             | 7.47     | 7.94     |
| Arizona              | 10,500  | 11.42            | 8.97     | 9.77     |
| Arkansas             | 3,500   | 8.40             | 16.37    | 18.51    |
| California           | 134,400 | 24.95            | 18.27    | 17.10    |
| Colorado             | 8,900   | 11.98            | 14.15    | 12.66    |
| Connecticut          | 4,600   | 8.91             | 10.08    | 10.57    |
| Delaware             | 1,600   | 12.38            | 15.20    | 12.13    |
| District of Columbia | 11,300  | 123.85           | 71.06    | 32.18    |
| Florida              | 60,500  | 21.59            | 19.99    | 18.27    |
| Georgia              | 33,100  | 24.40            | 29.04    | 25.42    |
| Hawaii               | 2,500   | 12.14            | 22.80    | 15.87    |
| Idaho *              | 630     | 2.85             | 5.56     | 6.50     |
| Illinois             | 27,800  | 15.16            | 13.14    | 13.79    |

|                                            |                |              |              |              |
|--------------------------------------------|----------------|--------------|--------------|--------------|
| Indiana                                    | 6,900          | 7.46         | 9.08         | 9.83         |
| Iowa                                       | 1,600          | 3.61         | 7.17         | 7.70         |
| Kansas                                     | 2,200          | 5.40         | 8.47         | 9.70         |
| Kentucky                                   | 5,300          | 8.44         | 11.02        | 11.59        |
| Louisiana                                  | 10,700         | 16.67        | 23.56        | 25.96        |
| Maine *                                    | 1,200          | 6.04         | 11.96        | 7.99         |
| Maryland                                   | 16,200         | 19.69        | 19.41        | 19.61        |
| Massachusetts                              | 12,200         | 12.77        | 13.42        | 10.80        |
| Michigan                                   | 10,900         | 7.64         | 8.17         | 9.69         |
| Minnesota                                  | 5,200          | 6.72         | 6.57         | 6.53         |
| Mississippi                                | 5,400          | 13.11        | 25.02        | 28.20        |
| Missouri                                   | 9,100          | 10.59        | 12.05        | 12.57        |
| Montana *                                  | 420            | 2.81         | 5.90         | 6.43         |
| Nebraska *                                 | 1,300          | 4.96         | 9.72         | 10.25        |
| Nevada                                     | 6,500          | 16.25        | 11.66        | 12.64        |
| New Hampshire *                            | 950            | 4.84         | 7.48         | 6.79         |
| New Jersey                                 | 16,800         | 13.33        | 12.04        | 12.83        |
| New Mexico                                 | 2,400          | 8.17         | 15.88        | 14.13        |
| New York                                   | 75,900         | 27.09        | 21.46        | 20.30        |
| North Carolina                             | 16,100         | 11.84        | 14.74        | 15.93        |
| North Dakota *                             | 190            | 1.84         | 3.72         | 4.79         |
| Ohio                                       | 14,800         | 8.95         | 9.45         | 10.63        |
| Oklahoma                                   | 4,100          | 7.61         | 9.54         | 10.88        |
| Oregon                                     | 5,800          | 10.21        | 11.54        | 9.58         |
| Pennsylvania                               | 16,100         | 8.66         | 9.46         | 10.08        |
| Rhode Island                               | 1,100          | 7.15         | 4.99         | 4.75         |
| South Carolina                             | 9,500          | 14.30        | 25.28        | 28.03        |
| South Dakota                               | 200            | 1.68         | 3.43         | 3.70         |
| Tennessee                                  | 11,000         | 12.09        | 13.66        | 14.70        |
| Texas                                      | 62,400         | 17.76        | 15.17        | 17.09        |
| Utah                                       | 1,700          | 4.62         | 4.57         | 5.23         |
| Vermont *                                  | 520            | 5.50         | 11.57        | 7.49         |
| Virginia                                   | 13,500         | 11.58        | 12.11        | 12.07        |
| Washington                                 | 10,400         | 10.45        | 10.28        | 9.23         |
| West Virginia *                            | 1,200          | 4.32         | 8.29         | 9.56         |
| Wisconsin                                  | 4,000          | 4.79         | 6.17         | 6.87         |
| Wyoming *                                  | 180            | 2.13         | 4.52         | 5.47         |
| <b>50 US States &amp; Washington, DC §</b> | <b>666,900</b> | <b>15.08</b> | <b>15.08</b> | <b>15.08</b> |

\* Counts indicated as numerically unstable, per the source US Centers for Disease Control and Prevention report [5]

§ Total counts calculated by different methodology than used for jurisdictions and thus do not sum to column totals, per the source US Centers for Disease Control and Prevention report [5]

**Supplement Table 5b.** Prevalence of undiagnosed HIV infection among men who have sex with men, by US state, 2012

| State                | n      | Rate per 100 MSM |          |          |
|----------------------|--------|------------------|----------|----------|
|                      |        | Method 1         | Method 2 | Method 3 |
| Alabama              | 1,600  | 2.36             | 3.24     | 3.92     |
| Alaska *             | 20     | 0.19             | 0.36     | 0.39     |
| Arizona              | 1,200  | 1.31             | 1.02     | 1.12     |
| Arkansas             | 800    | 1.92             | 3.74     | 4.23     |
| California           | 16,400 | 3.04             | 2.23     | 2.09     |
| Colorado             | 950    | 1.28             | 1.51     | 1.35     |
| Connecticut          | 710    | 1.38             | 1.56     | 1.63     |
| Delaware             | 240    | 1.86             | 2.28     | 1.82     |
| District of Columbia | 1,400  | 15.34            | 8.80     | 3.99     |
| Florida              | 8,100  | 2.89             | 2.68     | 2.45     |
| Georgia              | 6,900  | 5.09             | 6.05     | 5.30     |
| Hawaii               | 220    | 1.07             | 2.01     | 1.40     |
| Idaho *              | 80     | 0.36             | 0.71     | 0.83     |
| Illinois             | 5,300  | 2.89             | 2.51     | 2.63     |
| Indiana              | 1,000  | 1.08             | 1.32     | 1.42     |
| Iowa                 | 330    | 0.74             | 1.48     | 1.59     |
| Kansas               | 380    | 0.93             | 1.46     | 1.67     |
| Kentucky             | 890    | 1.42             | 1.85     | 1.95     |
| Louisiana            | 2,700  | 4.21             | 5.94     | 6.55     |
| Maine *              | 90     | 0.45             | 0.90     | 0.60     |
| Maryland             | 3,900  | 4.74             | 4.67     | 4.72     |
| Massachusetts        | 2,000  | 2.09             | 2.20     | 1.77     |
| Michigan             | 1,900  | 1.33             | 1.42     | 1.69     |
| Minnesota            | 770    | 1.00             | 0.97     | 0.97     |
| Mississippi          | 1,200  | 2.91             | 5.56     | 6.27     |
| Missouri             | 1,500  | 1.74             | 1.99     | 2.07     |
| Montana *            | 30     | 0.20             | 0.42     | 0.46     |
| Nebraska *           | 190    | 0.72             | 1.42     | 1.50     |
| Nevada               | 1,000  | 2.50             | 1.79     | 1.94     |
| New Hampshire *      | 120    | 0.61             | 0.95     | 0.86     |
| New Jersey           | 3,700  | 2.94             | 2.65     | 2.83     |
| New Mexico           | 280    | 0.95             | 1.85     | 1.65     |
| New York             | 7,700  | 2.75             | 2.18     | 2.06     |
| North Carolina       | 2,600  | 1.91             | 2.38     | 2.57     |
| North Dakota *       | 20     | 0.19             | 0.39     | 0.50     |
| Ohio                 | 3,100  | 1.87             | 1.98     | 2.23     |
| Oklahoma             | 740    | 1.37             | 1.72     | 1.96     |
| Oregon               | 850    | 1.50             | 1.69     | 1.40     |

|                                                       |               |             |             |             |
|-------------------------------------------------------|---------------|-------------|-------------|-------------|
| Pennsylvania                                          | 2,700         | 1.45        | 1.59        | 1.69        |
| Rhode Island                                          | 200           | 1.30        | 0.91        | 0.86        |
| South Carolina                                        | 2,000         | 3.01        | 5.32        | 5.90        |
| South Dakota                                          | 30            | 0.25        | 0.51        | 0.55        |
| Tennessee                                             | 1,800         | 1.98        | 2.24        | 2.40        |
| Texas                                                 | 12,100        | 3.44        | 2.94        | 3.31        |
| Utah                                                  | 250           | 0.68        | 0.67        | 0.77        |
| Vermont *                                             | 0             | 0.00        | 0.00        | 0.00        |
| Virginia                                              | 2,000         | 1.72        | 1.79        | 1.79        |
| Washington                                            | 1,300         | 1.31        | 1.28        | 1.15        |
| West Virginia *                                       | 200           | 0.72        | 1.38        | 1.59        |
| Wisconsin                                             | 650           | 0.78        | 1.00        | 1.12        |
| Wyoming *                                             | 40            | 0.47        | 1.00        | 1.22        |
| <b>50 US States &amp; Washington, DC <sup>§</sup></b> | <b>98,700</b> | <b>2.34</b> | <b>2.34</b> | <b>2.34</b> |

\* Counts indicated as numerically unstable, per the source US Centers for Disease Control and Prevention report [5]

<sup>§</sup> Total counts calculated by different methodology than used for jurisdictions and thus do not sum to column totals, per the source US Centers for Disease Control and Prevention report [5]

**Supplement Table 6a.** Prevalence of HIV diagnoses among men who have sex with men, 104 US metropolitan statistical areas, 2012

| Metropolitan Statistical Area           | n      | Rate per 100 MSM |          |          |
|-----------------------------------------|--------|------------------|----------|----------|
|                                         |        | Method 1         | Method 2 | Method 3 |
| Akron, OH                               | 529    | 5.20             | 9.38     | 9.10     |
| Albany--Schenectady--Troy, NY           | 778    | 6.04             | 10.90    | 8.37     |
| Albuquerque, NM                         | 878    | 6.92             | 12.49    | 10.20    |
| Allentown--Bethlehem--Easton, PA--NJ    | 405    | 3.41             | 6.14     | 6.10     |
| Atlanta--Sandy Springs--Roswell, GA     | 16,404 | 22.47            | 19.93    | 16.43    |
| Augusta--Richmond County, GA--SC        | 920    | 11.56            | 20.85    | 26.56    |
| Austin--Round Rock, TX                  | 3,201  | 12.72            | 8.76     | 8.01     |
| Bakersfield, CA                         | 692    | 5.85             | 10.55    | 11.68    |
| Baltimore--Columbia--Towson, MD         | 5,631  | 14.58            | 12.56    | 12.56    |
| Baton Rouge, LA                         | 1,575  | 13.78            | 24.86    | 25.40    |
| Birmingham--Hoover, AL                  | 2,196  | 13.87            | 9.76     | 13.35    |
| Boise City, ID                          | 271    | 3.14             | 5.66     | 7.08     |
| Boston--Cambridge--Newton, MA--NH       | 6,216  | 9.33             | 8.37     | 6.67     |
| Bridgeport--Stamford--Norwalk, CT       | 841    | 6.52             | 11.75    | 10.11    |
| Buffalo--Cheektowaga--Niagara Falls, NY | 937    | 5.67             | 3.55     | 4.27     |
| Cape Coral--Fort Myers, FL              | 618    | 6.49             | 11.71    | 8.63     |
| Charleston--North Charleston, SC        | 1,112  | 11.48            | 20.71    | 20.08    |
| Charlotte--Concord--Gastonia, NC--SC    | 3,567  | 11.53            | 8.85     | 10.24    |

|                                                 |        |       |       |       |
|-------------------------------------------------|--------|-------|-------|-------|
| Chattanooga, TN--GA                             | 657    | 8.62  | 15.55 | 15.06 |
| Chicago--Naperville--Elgin, IL--IN--WI          | 18,183 | 13.64 | 9.70  | 10.26 |
| Cincinnati, OH--KY--IN                          | 2,198  | 7.37  | 5.78  | 7.10  |
| Cleveland--Elyria, OH                           | 2,824  | 9.61  | 6.63  | 8.38  |
| Colorado Springs, CO                            | 522    | 5.64  | 10.17 | 11.46 |
| Columbia, SC                                    | 1,893  | 17.21 | 31.03 | 29.65 |
| Columbus, OH                                    | 3,326  | 12.26 | 8.45  | 8.88  |
| Dallas--Fort Worth--Arlington, TX               | 14,654 | 16.54 | 10.54 | 11.11 |
| Dayton, OH                                      | 911    | 7.95  | 14.34 | 13.84 |
| Deltona--Daytona Beach--Ormond Beach, FL        | 709    | 7.88  | 14.21 | 12.63 |
| Denver--Aurora--Lakewood, CO                    | 6,428  | 17.41 | 14.78 | 12.01 |
| Des Moines--West Des Moines, IA                 | 361    | 4.53  | 8.16  | 7.49  |
| Detroit--Warren--Dearborn, MI                   | 5,834  | 9.63  | 7.40  | 9.28  |
| Durham--Chapel Hill, NC                         | 959    | 13.27 | 23.92 | 17.47 |
| El Paso, TX                                     | 1,242  | 11.88 | 21.42 | 28.53 |
| Fresno, CA                                      | 1,034  | 8.20  | 14.79 | 13.79 |
| Grand Rapids--Wyoming, MI                       | 587    | 4.21  | 2.92  | 3.49  |
| Greensboro--High Point, NC                      | 1,217  | 11.95 | 21.55 | 20.98 |
| Greenville--Anderson--Mauldin, SC               | 903    | 7.64  | 13.78 | 16.07 |
| Harrisburg--Carlisle, PA                        | 534    | 6.64  | 11.97 | 9.37  |
| Hartford--West Hartford--East Hartford, CT      | 1,032  | 5.85  | 3.81  | 4.54  |
| Houston--The Woodlands--Sugar Land, TX          | 12,861 | 15.64 | 10.36 | 12.59 |
| Indianapolis--Carmel--Anderson, IN              | 2,951  | 11.24 | 8.33  | 8.97  |
| Jackson, MS                                     | 1,606  | 20.86 | 37.62 | 39.49 |
| Jacksonville, FL                                | 2,437  | 12.65 | 8.59  | 10.70 |
| Kansas City, MO--KS                             | 3,309  | 11.76 | 9.47  | 9.99  |
| Knoxville, TN                                   | 757    | 6.14  | 11.07 | 12.36 |
| Lakeland--Winter Haven, FL                      | 591    | 6.77  | 12.20 | 10.72 |
| Lancaster, PA                                   | 270    | 3.68  | 6.63  | 5.82  |
| Las Vegas--Henderson--Paradise, NV              | 4,121  | 14.38 | 8.25  | 8.99  |
| Little Rock--North Little Rock--Conway, AR      | 1,208  | 12.23 | 22.06 | 23.33 |
| Los Angeles--Long Beach--Anaheim, CA            | 39,798 | 21.52 | 12.35 | 12.92 |
| Louisville--Jefferson County, KY--IN            | 1,874  | 10.61 | 7.38  | 8.24  |
| Madison, WI                                     | 427    | 4.70  | 8.47  | 6.65  |
| McAllen--Edinburg--Mission, TX                  | 605    | 6.42  | 11.58 | 14.12 |
| Memphis, TN--MS--AR                             | 3,704  | 20.76 | 13.70 | 17.61 |
| Miami--Fort Lauderdale--West Palm Beach, FL     | 23,407 | 28.62 | 21.57 | 17.52 |
| Milwaukee--Waukesha--West Allis, WI             | 1,836  | 8.38  | 5.81  | 7.08  |
| Minneapolis--St. Paul--Bloomington, MN--WI      | 3,890  | 8.09  | 5.91  | 5.73  |
| Modesto, CA                                     | 312    | 4.46  | 8.05  | 9.70  |
| Nashville--Davidson--Murfreesboro--Franklin, TN | 2,974  | 12.49 | 9.76  | 9.80  |
| New Haven--Milford, CT                          | 870    | 7.04  | 12.70 | 11.77 |
| New Orleans--Metairie, LA                       | 4,020  | 23.65 | 19.54 | 19.71 |

|                                                   |        |       |       |       |
|---------------------------------------------------|--------|-------|-------|-------|
| New York--Newark--Jersey City, NY--NJ--PA         | 57,861 | 20.71 | 15.01 | 14.61 |
| North Port--Sarasota--Bradenton, FL               | 795    | 7.43  | 13.39 | 9.80  |
| Ogden--Clearfield, UT                             | 185    | 2.37  | 4.28  | 5.10  |
| Oklahoma City, OK                                 | 1,599  | 8.94  | 6.31  | 7.52  |
| Omaha--Council Bluffs, NE--IA                     | 704    | 5.80  | 10.46 | 9.30  |
| Orlando--Kissimmee--Sanford, FL                   | 5,555  | 17.90 | 12.82 | 12.20 |
| Oxnard--Thousand Oaks--Ventura, CA                | 610    | 5.20  | 9.37  | 8.11  |
| Palm Bay--Melbourne--Titusville, FL               | 539    | 6.54  | 11.79 | 10.71 |
| Philadelphia--Camden--Wilmington, PA--NJ--DE--MD  | 9,127  | 10.78 | 9.14  | 9.09  |
| Phoenix--Mesa--Scottsdale, AZ                     | 6,511  | 10.91 | 6.53  | 7.31  |
| Pittsburgh, PA                                    | 1,785  | 5.10  | 3.70  | 4.71  |
| Portland--South Portland, ME                      | 416    | 5.47  | 9.87  | 5.50  |
| Portland--Vancouver--Hillsboro, OR--WA            | 3,043  | 9.36  | 7.49  | 5.82  |
| Providence--Warwick, RI--MA                       | 1,206  | 5.17  | 4.03  | 3.89  |
| Provo--Orem, UT                                   | 87     | 1.32  | 2.38  | 3.67  |
| Raleigh, NC                                       | 1,816  | 11.53 | 7.25  | 9.02  |
| Richmond, VA                                      | 2,259  | 13.13 | 11.69 | 12.71 |
| Riverside--San Bernardino--Ontario, CA            | 5,406  | 9.32  | 6.74  | 5.79  |
| Rochester, NY                                     | 1,139  | 7.29  | 4.84  | 5.47  |
| Sacramento--Roseville--Arden-Arcade, CA           | 2,191  | 7.17  | 4.84  | 4.89  |
| St. Louis, MO--IL                                 | 4,526  | 11.51 | 10.67 | 11.59 |
| Salt Lake City, UT                                | 1,128  | 7.53  | 4.41  | 4.98  |
| San Antonio--New Braunfels, TX                    | 3,598  | 12.09 | 7.61  | 10.14 |
| San Diego--Carlsbad--San Marcos, CA               | 9,170  | 19.83 | 11.38 | 11.50 |
| San Francisco--Oakland--Hayward, CA               | 17,152 | 26.26 | 18.69 | 11.45 |
| San Jose--Sunnyvale--Santa Clara, CA              | 2,248  | 8.26  | 4.80  | 5.96  |
| Scranton--Wilkes-Barre--Hazleton, PA              | 212    | 2.52  | 4.55  | 5.67  |
| Seattle--Tacoma--Bellevue, WA                     | 5,938  | 11.54 | 8.12  | 7.24  |
| Spokane--Spokane Valley, WA                       | 254    | 3.29  | 5.93  | 4.82  |
| Springfield, MA                                   | 556    | 6.25  | 11.27 | 10.74 |
| Stockton--Lodi, CA                                | 524    | 5.62  | 10.14 | 10.21 |
| Syracuse, NY                                      | 487    | 5.11  | 9.21  | 7.92  |
| Tampa--St. Petersburg--Clearwater, FL             | 5,504  | 13.42 | 8.55  | 8.84  |
| Toledo, OH                                        | 516    | 5.93  | 10.70 | 11.29 |
| Tucson, AZ                                        | 1,292  | 9.02  | 16.26 | 12.42 |
| Tulsa, OK                                         | 1,029  | 7.81  | 14.09 | 14.08 |
| Honolulu (Urban), HI                              | 1,170  | 8.08  | 14.58 | 11.26 |
| Virginia Beach--Norfolk--Newport News, VA--NC     | 3,527  | 14.53 | 11.12 | 14.40 |
| Washington--Arlington--Alexandria, DC--VA--MD--WV | 15,976 | 19.80 | 17.56 | 13.43 |
| Wichita, KS                                       | 477    | 5.43  | 9.79  | 11.87 |
| Winston-Salem, NC                                 | 790    | 8.80  | 15.87 | 16.08 |
| Worcester, MA--CT                                 | 541    | 4.05  | 7.30  | 6.21  |
| Youngstown--Warren--Boardman, OH--PA              | 322    | 3.90  | 7.03  | 9.07  |

---

**Supplement Table 6b.** Rates of new diagnoses among men who have sex with men, 104 US metropolitan statistical areas, 2013

| Metropolitan Statistical Area            | n     | Rate per 100 MSM |          |          |
|------------------------------------------|-------|------------------|----------|----------|
|                                          |       | Method 1         | Method 2 | Method 3 |
| Akron, OH                                | 36    | 0.35             | 0.63     | 0.58     |
| Albany--Schenectady--Troy, NY            | 33    | 0.25             | 0.46     | 0.35     |
| Albuquerque, NM                          | 47    | 0.37             | 0.66     | 0.50     |
| Allentown--Bethlehem--Easton, PA--NJ     | 30    | 0.25             | 0.45     | 0.46     |
| Atlanta--Sandy Springs--Roswell, GA      | 1,393 | 1.88             | 1.67     | 1.36     |
| Augusta--Richmond County, GA--SC         | 89    | 1.10             | 1.99     | 2.79     |
| Austin--Round Rock, TX                   | 256   | 0.99             | 0.68     | 0.63     |
| Bakersfield, CA                          | 72    | 0.60             | 1.09     | 1.13     |
| Baltimore--Columbia--Towson, MD          | 515   | 1.32             | 1.14     | 1.14     |
| Baton Rouge, LA                          | 155   | 1.34             | 2.42     | 2.91     |
| Birmingham--Hoover, AL                   | 130   | 0.82             | 0.58     | 0.79     |
| Boise City, ID                           | 13    | 0.15             | 0.27     | 0.33     |
| Boston--Cambridge--Newton, MA--NH        | 423   | 0.63             | 0.56     | 0.46     |
| Bridgeport--Stamford--Norwalk, CT        | 50    | 0.38             | 0.69     | 0.61     |
| Buffalo--Cheektowaga--Niagara Falls, NY  | 80    | 0.48             | 0.30     | 0.37     |
| Cape Coral--Fort Myers, FL               | 72    | 0.74             | 1.34     | 0.93     |
| Charleston--North Charleston, SC         | 84    | 0.85             | 1.53     | 1.46     |
| Charlotte--Concord--Gastonia, NC--SC     | 285   | 0.90             | 0.69     | 0.80     |
| Chattanooga, TN--GA                      | 35    | 0.45             | 0.82     | 0.85     |
| Chicago--Naperville--Elgin, IL--IN--WI   | 1,361 | 1.01             | 0.72     | 0.78     |
| Cincinnati, OH--KY--IN                   | 168   | 0.56             | 0.44     | 0.53     |
| Cleveland--Elyria, OH                    | 218   | 0.74             | 0.51     | 0.63     |
| Colorado Springs, CO                     | 18    | 0.19             | 0.34     | 0.36     |
| Columbia, SC                             | 99    | 0.89             | 1.60     | 1.43     |
| Columbus, OH                             | 229   | 0.83             | 0.58     | 0.56     |
| Dallas--Fort Worth--Arlington, TX        | 1,019 | 1.13             | 0.72     | 0.76     |
| Dayton, OH                               | 61    | 0.53             | 0.96     | 0.89     |
| Deltona--Daytona Beach--Ormond Beach, FL | 55    | 0.61             | 1.10     | 0.95     |
| Denver--Aurora--Lakewood, CO             | 198   | 0.52             | 0.45     | 0.36     |
| Des Moines--West Des Moines, IA          | 28    | 0.34             | 0.62     | 0.57     |
| Detroit--Warren--Dearborn, MI            | 390   | 0.64             | 0.49     | 0.61     |
| Durham--Chapel Hill, NC                  | 70    | 0.94             | 1.70     | 1.13     |
| El Paso, TX                              | 96    | 0.90             | 1.62     | 2.22     |
| Fresno, CA                               | 88    | 0.69             | 1.24     | 1.16     |
| Grand Rapids--Wyoming, MI                | 31    | 0.22             | 0.15     | 0.19     |
| Greensboro--High Point, NC               | 75    | 0.73             | 1.32     | 1.26     |
| Greenville--Anderson--Mauldin, SC        | 80    | 0.67             | 1.21     | 1.42     |
| Harrisburg--Carlisle, PA                 | 30    | 0.37             | 0.67     | 0.52     |



|                                                  |       |      |      |      |
|--------------------------------------------------|-------|------|------|------|
| Hartford--West Hartford--East Hartford, CT       | 73    | 0.41 | 0.27 | 0.33 |
| Houston--The Woodlands--Sugar Land, TX           | 1,013 | 1.20 | 0.80 | 0.98 |
| Indianapolis--Carmel--Anderson, IN               | 175   | 0.66 | 0.49 | 0.53 |
| Jackson, MS                                      | 106   | 1.36 | 2.46 | 2.51 |
| Jacksonville, FL                                 | 210   | 1.08 | 0.73 | 0.95 |
| Kansas City, MO--KS                              | 154   | 0.54 | 0.44 | 0.47 |
| Knoxville, TN                                    | 49    | 0.39 | 0.71 | 0.81 |
| Lakeland--Winter Haven, FL                       | 49    | 0.56 | 1.00 | 0.88 |
| Lancaster, PA                                    | 27    | 0.36 | 0.66 | 0.55 |
| Las Vegas--Henderson--Paradise, NV               | 292   | 1.01 | 0.58 | 0.63 |
| Little Rock--North Little Rock--Conway, AR       | 124   | 1.24 | 2.24 | 2.24 |
| Los Angeles--Long Beach--Anaheim, CA             | 1,938 | 1.04 | 0.59 | 0.62 |
| Louisville--Jefferson County, KY--IN             | 136   | 0.76 | 0.53 | 0.58 |
| Madison, WI                                      | 27    | 0.29 | 0.53 | 0.41 |
| McAllen--Edinburg--Mission, TX                   | 66    | 0.68 | 1.23 | 1.60 |
| Memphis, TN--MS--AR                              | 257   | 1.43 | 0.94 | 1.18 |
| Miami--Fort Lauderdale--West Palm Beach, FL      | 1,592 | 1.92 | 1.44 | 1.13 |
| Milwaukee--Waukesha--West Allis, WI              | 98    | 0.44 | 0.31 | 0.37 |
| Minneapolis--St. Paul--Bloomington, MN--WI       | 177   | 0.36 | 0.27 | 0.25 |
| Modesto, CA                                      | 15    | 0.21 | 0.38 | 0.53 |
| Nashville--Davidson--Murfreesboro--Franklin, TN  | 181   | 0.75 | 0.58 | 0.62 |
| New Haven--Milford, CT                           | 56    | 0.45 | 0.81 | 0.73 |
| New Orleans--Metairie, LA                        | 356   | 2.05 | 1.69 | 1.68 |
| New York--Newark--Jersey City, NY--NJ--PA        | 3,007 | 1.07 | 0.77 | 0.76 |
| North Port--Sarasota--Bradenton, FL              | 54    | 0.50 | 0.90 | 0.69 |
| Ogden--Clearfield, UT                            | 6     | 0.08 | 0.14 | 0.17 |
| Oklahoma City, OK                                | 155   | 0.85 | 0.60 | 0.74 |
| Omaha--Council Bluffs, NE--IA                    | 35    | 0.28 | 0.51 | 0.44 |
| Orlando--Kissimmee--Sanford, FL                  | 368   | 1.16 | 0.83 | 0.80 |
| Oxnard--Thousand Oaks--Ventura, CA               | 53    | 0.45 | 0.81 | 0.73 |
| Palm Bay--Melbourne--Titusville, FL              | 45    | 0.54 | 0.98 | 0.88 |
| Philadelphia--Camden--Wilmington, PA--NJ--DE--MD | 614   | 0.72 | 0.61 | 0.61 |
| Phoenix--Mesa--Scottsdale, AZ                    | 406   | 0.67 | 0.40 | 0.44 |
| Pittsburgh, PA                                   | 109   | 0.31 | 0.22 | 0.28 |
| Portland--South Portland, ME                     | 12    | 0.16 | 0.28 | 0.17 |
| Portland--Vancouver--Hillsboro, OR--WA           | 139   | 0.42 | 0.34 | 0.26 |
| Providence--Warwick, RI--MA                      | 94    | 0.40 | 0.31 | 0.30 |
| Provo--Orem, UT                                  | 3     | 0.04 | 0.08 | 0.13 |
| Raleigh, NC                                      | 141   | 0.87 | 0.55 | 0.67 |
| Richmond, VA                                     | 123   | 0.70 | 0.63 | 0.70 |
| Riverside--San Bernardino--Ontario, CA           | 370   | 0.63 | 0.45 | 0.39 |
| Rochester, NY                                    | 67    | 0.43 | 0.28 | 0.34 |
| Sacramento--Roseville--Arden-Arcade, CA          | 149   | 0.48 | 0.33 | 0.34 |

---

|                                                   |       |      |      |      |
|---------------------------------------------------|-------|------|------|------|
| St. Louis, MO--IL                                 | 233   | 0.59 | 0.55 | 0.61 |
| Salt Lake City, UT                                | 45    | 0.29 | 0.17 | 0.19 |
| San Antonio--New Braunfels, TX                    | 365   | 1.20 | 0.75 | 0.96 |
| San Diego--Carlsbad--San Marcos, CA               | 425   | 0.90 | 0.52 | 0.52 |
| San Francisco--Oakland--Hayward, CA               | 643   | 0.97 | 0.69 | 0.44 |
| San Jose--Sunnyvale--Santa Clara, CA              | 109   | 0.39 | 0.23 | 0.29 |
| Scranton--Wilkes-Barre--Hazleton, PA              | 11    | 0.13 | 0.24 | 0.28 |
| Seattle--Tacoma--Bellevue, WA                     | 245   | 0.47 | 0.33 | 0.30 |
| Spokane--Spokane Valley, WA                       | 11    | 0.14 | 0.25 | 0.22 |
| Springfield, MA                                   | 41    | 0.46 | 0.83 | 0.77 |
| Stockton--Lodi, CA                                | 60    | 0.63 | 1.15 | 1.15 |
| Syracuse, NY                                      | 31    | 0.32 | 0.58 | 0.52 |
| Tampa--St. Petersburg--Clearwater, FL             | 402   | 0.97 | 0.62 | 0.64 |
| Toledo, OH                                        | 37    | 0.42 | 0.77 | 0.87 |
| Tucson, AZ                                        | 64    | 0.44 | 0.80 | 0.63 |
| Tulsa, OK                                         | 111   | 0.83 | 1.51 | 1.47 |
| Honolulu (Urban), HI                              | 48    | 0.33 | 0.59 | 0.47 |
| Virginia Beach--Norfolk--Newport News, VA--NC     | 242   | 0.99 | 0.76 | 0.97 |
| Washington--Arlington--Alexandria, DC--VA--MD--WV | 1,105 | 1.34 | 1.19 | 0.90 |
| Wichita, KS                                       | 19    | 0.21 | 0.39 | 0.45 |
| Winston-Salem, NC                                 | 54    | 0.60 | 1.08 | 1.11 |
| Worcester, MA--CT                                 | 33    | 0.24 | 0.44 | 0.37 |
| Youngstown--Warren--Boardman, OH--PA              | 20    | 0.24 | 0.44 | 0.55 |

**Supplement Table 6c.** Rates of new diagnoses among men who have sex with men and who do not have an HIV diagnosis, 104 US metropolitan statistical areas, 2013

| Metropolitan Statistical Area        | n     | Rate per 100 MSM<br>without an HIV diagnosis |          |          |
|--------------------------------------|-------|----------------------------------------------|----------|----------|
|                                      |       | Method 1                                     | Method 2 | Method 3 |
| Akron, OH                            | 36    | 0.37                                         | 0.70     | 0.63     |
| Albany--Schenectady--Troy, NY        | 33    | 0.27                                         | 0.52     | 0.38     |
| Albuquerque, NM                      | 47    | 0.39                                         | 0.75     | 0.56     |
| Allentown--Bethlehem--Easton, PA--NJ | 30    | 0.26                                         | 0.48     | 0.49     |
| Atlanta--Sandy Springs--Roswell, GA  | 1,393 | 2.41                                         | 2.08     | 1.62     |
| Augusta--Richmond County, GA--SC     | 89    | 1.25                                         | 2.51     | 3.91     |
| Austin--Round Rock, TX               | 256   | 1.13                                         | 0.74     | 0.68     |
| Bakersfield, CA                      | 72    | 0.64                                         | 1.21     | 1.26     |
| Baltimore--Columbia--Towson, MD      | 515   | 1.54                                         | 1.30     | 1.30     |
| Baton Rouge, LA                      | 155   | 1.55                                         | 3.22     | 4.14     |
| Birmingham--Hoover, AL               | 130   | 0.95                                         | 0.64     | 0.92     |
| Boise City, ID                       | 13    | 0.15                                         | 0.28     | 0.35     |
| Boston--Cambridge--Newton, MA--NH    | 423   | 0.69                                         | 0.61     | 0.49     |

|                                             |       |      |      |      |
|---------------------------------------------|-------|------|------|------|
| Bridgeport--Stamford--Norwalk, CT           | 50    | 0.41 | 0.78 | 0.68 |
| Buffalo--Cheektowaga--Niagara Falls, NY     | 80    | 0.51 | 0.31 | 0.39 |
| Cape Coral--Fort Myers, FL                  | 72    | 0.79 | 1.52 | 1.01 |
| Charleston--North Charleston, SC            | 84    | 0.95 | 1.92 | 1.81 |
| Charlotte--Concord--Gastonia, NC--SC        | 285   | 1.02 | 0.76 | 0.89 |
| Chattanooga, TN--GA                         | 35    | 0.50 | 0.97 | 1.02 |
| Chicago--Naperville--Elgin, IL--IN--WI      | 1,361 | 1.17 | 0.80 | 0.87 |
| Cincinnati, OH--KY--IN                      | 168   | 0.60 | 0.47 | 0.57 |
| Cleveland--Elyria, OH                       | 218   | 0.82 | 0.55 | 0.68 |
| Colorado Springs, CO                        | 18    | 0.20 | 0.38 | 0.40 |
| Columbia, SC                                | 99    | 1.07 | 2.30 | 1.96 |
| Columbus, OH                                | 229   | 0.95 | 0.63 | 0.62 |
| Dallas--Fort Worth--Arlington, TX           | 1,019 | 1.34 | 0.80 | 0.85 |
| Dayton, OH                                  | 61    | 0.58 | 1.12 | 1.02 |
| Deltona--Daytona Beach--Ormond Beach, FL    | 55    | 0.66 | 1.28 | 1.09 |
| Denver--Aurora--Lakewood, CO                | 198   | 0.63 | 0.52 | 0.40 |
| Des Moines--West Des Moines, IA             | 28    | 0.36 | 0.68 | 0.62 |
| Detroit--Warren--Dearborn, MI               | 390   | 0.71 | 0.53 | 0.68 |
| Durham--Chapel Hill, NC                     | 70    | 1.08 | 2.21 | 1.34 |
| El Paso, TX                                 | 96    | 1.01 | 2.04 | 3.11 |
| Fresno, CA                                  | 88    | 0.75 | 1.46 | 1.35 |
| Grand Rapids--Wyoming, MI                   | 31    | 0.23 | 0.16 | 0.19 |
| Greensboro--High Point, NC                  | 75    | 0.83 | 1.67 | 1.58 |
| Greenville--Anderson--Mauldin, SC           | 80    | 0.72 | 1.40 | 1.69 |
| Harrisburg--Carlisle, PA                    | 30    | 0.40 | 0.76 | 0.57 |
| Hartford--West Hartford--East Hartford, CT  | 73    | 0.44 | 0.28 | 0.35 |
| Houston--The Woodlands--Sugar Land, TX      | 1,013 | 1.42 | 0.89 | 1.11 |
| Indianapolis--Carmel--Anderson, IN          | 175   | 0.74 | 0.53 | 0.58 |
| Jackson, MS                                 | 106   | 1.72 | 3.93 | 4.05 |
| Jacksonville, FL                            | 210   | 1.23 | 0.80 | 1.07 |
| Kansas City, MO--KS                         | 154   | 0.61 | 0.48 | 0.52 |
| Knoxville, TN                               | 49    | 0.42 | 0.80 | 0.92 |
| Lakeland--Winter Haven, FL                  | 49    | 0.60 | 1.14 | 0.99 |
| Lancaster, PA                               | 27    | 0.38 | 0.70 | 0.58 |
| Las Vegas--Henderson--Paradise, NV          | 292   | 1.17 | 0.63 | 0.69 |
| Little Rock--North Little Rock--Conway, AR  | 124   | 1.41 | 2.87 | 2.87 |
| Los Angeles--Long Beach--Anaheim, CA        | 1,938 | 1.31 | 0.68 | 0.71 |
| Louisville--Jefferson County, KY--IN        | 136   | 0.85 | 0.57 | 0.63 |
| Madison, WI                                 | 27    | 0.31 | 0.58 | 0.44 |
| McAllen--Edinburg--Mission, TX              | 66    | 0.73 | 1.39 | 1.88 |
| Memphis, TN--MS--AR                         | 257   | 1.80 | 1.09 | 1.43 |
| Miami--Fort Lauderdale--West Palm Beach, FL | 1,592 | 2.67 | 1.83 | 1.35 |
| Milwaukee--Waukesha--West Allis, WI         | 98    | 0.48 | 0.33 | 0.40 |

|                                                  |       |      |      |      |
|--------------------------------------------------|-------|------|------|------|
| Minneapolis--St. Paul--Bloomington, MN--WI       | 177   | 0.40 | 0.28 | 0.26 |
| Modesto, CA                                      | 15    | 0.22 | 0.42 | 0.59 |
| Nashville--Davidson--Murfreesboro--Franklin, TN  | 181   | 0.85 | 0.65 | 0.70 |
| New Haven--Milford, CT                           | 56    | 0.48 | 0.93 | 0.83 |
| New Orleans--Metairie, LA                        | 356   | 2.67 | 2.09 | 2.08 |
| New York--Newark--Jersey City, NY--NJ--PA        | 3,007 | 1.34 | 0.91 | 0.89 |
| North Port--Sarasota--Bradenton, FL              | 54    | 0.54 | 1.04 | 0.76 |
| Ogden--Clearfield, UT                            | 6     | 0.08 | 0.14 | 0.18 |
| Oklahoma City, OK                                | 155   | 0.94 | 0.64 | 0.80 |
| Omaha--Council Bluffs, NE--IA                    | 35    | 0.30 | 0.57 | 0.48 |
| Orlando--Kissimmee--Sanford, FL                  | 368   | 1.41 | 0.95 | 0.92 |
| Oxnard--Thousand Oaks--Ventura, CA               | 53    | 0.47 | 0.89 | 0.79 |
| Palm Bay--Melbourne--Titusville, FL              | 45    | 0.58 | 1.11 | 0.99 |
| Philadelphia--Camden--Wilmington, PA--NJ--DE--MD | 614   | 0.80 | 0.67 | 0.67 |
| Phoenix--Mesa--Scottsdale, AZ                    | 406   | 0.75 | 0.43 | 0.47 |
| Pittsburgh, PA                                   | 109   | 0.33 | 0.23 | 0.29 |
| Portland--South Portland, ME                     | 12    | 0.17 | 0.31 | 0.18 |
| Portland--Vancouver--Hillsboro, OR--WA           | 139   | 0.46 | 0.36 | 0.28 |
| Providence--Warwick, RI--MA                      | 94    | 0.42 | 0.33 | 0.32 |
| Provo--Orem, UT                                  | 3     | 0.04 | 0.08 | 0.14 |
| Raleigh, NC                                      | 141   | 0.98 | 0.59 | 0.73 |
| Richmond, VA                                     | 123   | 0.81 | 0.71 | 0.81 |
| Riverside--San Bernardino--Ontario, CA           | 370   | 0.69 | 0.48 | 0.41 |
| Rochester, NY                                    | 67    | 0.46 | 0.30 | 0.36 |
| Sacramento--Roseville--Arden-Arcade, CA          | 149   | 0.52 | 0.34 | 0.35 |
| St. Louis, MO--IL                                | 233   | 0.66 | 0.61 | 0.69 |
| Salt Lake City, UT                               | 45    | 0.32 | 0.18 | 0.20 |
| San Antonio--New Braunfels, TX                   | 365   | 1.36 | 0.82 | 1.06 |
| San Diego--Carlsbad--San Marcos, CA              | 425   | 1.12 | 0.59 | 0.59 |
| San Francisco--Oakland--Hayward, CA              | 643   | 1.31 | 0.85 | 0.50 |
| San Jose--Sunnyvale--Santa Clara, CA             | 109   | 0.43 | 0.24 | 0.31 |
| Scranton--Wilkes-Barre--Hazleton, PA             | 11    | 0.13 | 0.25 | 0.30 |
| Seattle--Tacoma--Bellevue, WA                    | 245   | 0.53 | 0.36 | 0.32 |
| Spokane--Spokane Valley, WA                      | 11    | 0.15 | 0.27 | 0.23 |
| Springfield, MA                                  | 41    | 0.49 | 0.93 | 0.86 |
| Stockton--Lodi, CA                               | 60    | 0.67 | 1.27 | 1.28 |
| Syracuse, NY                                     | 31    | 0.34 | 0.64 | 0.56 |
| Tampa--St. Petersburg--Clearwater, FL            | 402   | 1.12 | 0.67 | 0.70 |
| Toledo, OH                                       | 37    | 0.45 | 0.86 | 0.99 |
| Tucson, AZ                                       | 64    | 0.49 | 0.95 | 0.72 |
| Tulsa, OK                                        | 111   | 0.90 | 1.75 | 1.70 |
| Honolulu (Urban), HI                             | 48    | 0.36 | 0.69 | 0.53 |
| Virginia Beach--Norfolk--Newport News, VA--NC    | 242   | 1.15 | 0.85 | 1.13 |

|                                                   |       |      |      |      |
|---------------------------------------------------|-------|------|------|------|
| Washington--Arlington--Alexandria, DC--VA--MD--WV | 1,105 | 1.66 | 1.44 | 1.03 |
| Wichita, KS                                       | 19    | 0.23 | 0.43 | 0.51 |
| Winston-Salem, NC                                 | 54    | 0.65 | 1.28 | 1.33 |
| Worcester, MA--CT                                 | 33    | 0.25 | 0.48 | 0.39 |
| Youngstown--Warren--Boardman, OH--PA              | 20    | 0.25 | 0.47 | 0.60 |

## Interpretation

In general, results were consistent between the three denominator methods, particularly at the state level. The single national MSM average Model 1 yielding the most inconsistent results, likely owing to having the most naïve assumptions. Several notable departures between the urbanicity-based model 2 and the urbanicity and ACS-based model 3 included San Francisco and DC. The former model yielded lower MSM denominators and implausibly high levels of HIV prevalence, likely due to a failure to detect these cities' unusually high densities of MSM, relative to their urbanicity level. Model 3 adjusted these estimates with a city-specific male-male cohabitation rate, yielding more plausible results. Conversely, at the MSA and county levels, some counties with extremely high prevalence per Method 3 were places with an above-average (for their level of urbanization) percent of the county population who were incarcerated. Persons who are diagnosed with HIV infection while incarcerated are counted as residing in the county of their incarceration, but incarcerated persons may not be included in the ACS information used in the denominators. Using the urbanicity-based Model 2, these prevalence values were reduced to more realistic but still high levels.

## References

1. Grey JA, Bernstein KT, Sullivan PS, Purcell DW, Chesson HW, Gift TL, and Rosenberg ES. *Estimating the population sizes of men who have sex with men (MSM) in US states and counties using data from the American Community Survey*. JMIR Public Health and Surveillance, (in-press).
2. Oster AM, Sternberg M, Lansky A, Broz D, Wejnert C, and Paz-Bailey G. *Population Size Estimates for Men who Have Sex with Men and Persons who Inject Drugs*. J Urban Health, 2015.
3. Purcell DW, Johnson CH, Lansky A, Prejean J, Stein R, Denning P, Gau Z, Weinstock H, Su J, and Crepaz N. *Estimating the population size of men who have sex with men in the United States to obtain HIV and syphilis rates*. Open AIDS J, 2012. 6: p. 98-107.
4. Lieb S, Thompson DR, Misra S, Gates GJ, Duffus WA, Fallon SJ, Liberti TM, Foust EM, Malow RM, and Team SACMP. *Estimating Populations of Men Who Have Sex with Men in the Southern United States*. Journal of Urban Health-Bulletin of the New York Academy of Medicine, 2009. 86(6): p. 887-901.
5. Hall HI, An Q, Tang T, Song R, Chen M, Green T, Kang J, Centers for Disease C, and Prevention. *Prevalence of Diagnosed and Undiagnosed HIV Infection--United States, 2008-2012*. MMWR Morb Mortal Wkly Rep, 2015. 64(24): p. 657-62.
